# Supplementary material for: ACAD10 protein expression and Neurobehavioral assessment of Acad10-deficient mice
Source: PubMed Central journal article supplement (PMC7728233; doi:10.1371/journal.pone.0242445), 2020-12-10

Figure 1. Original images

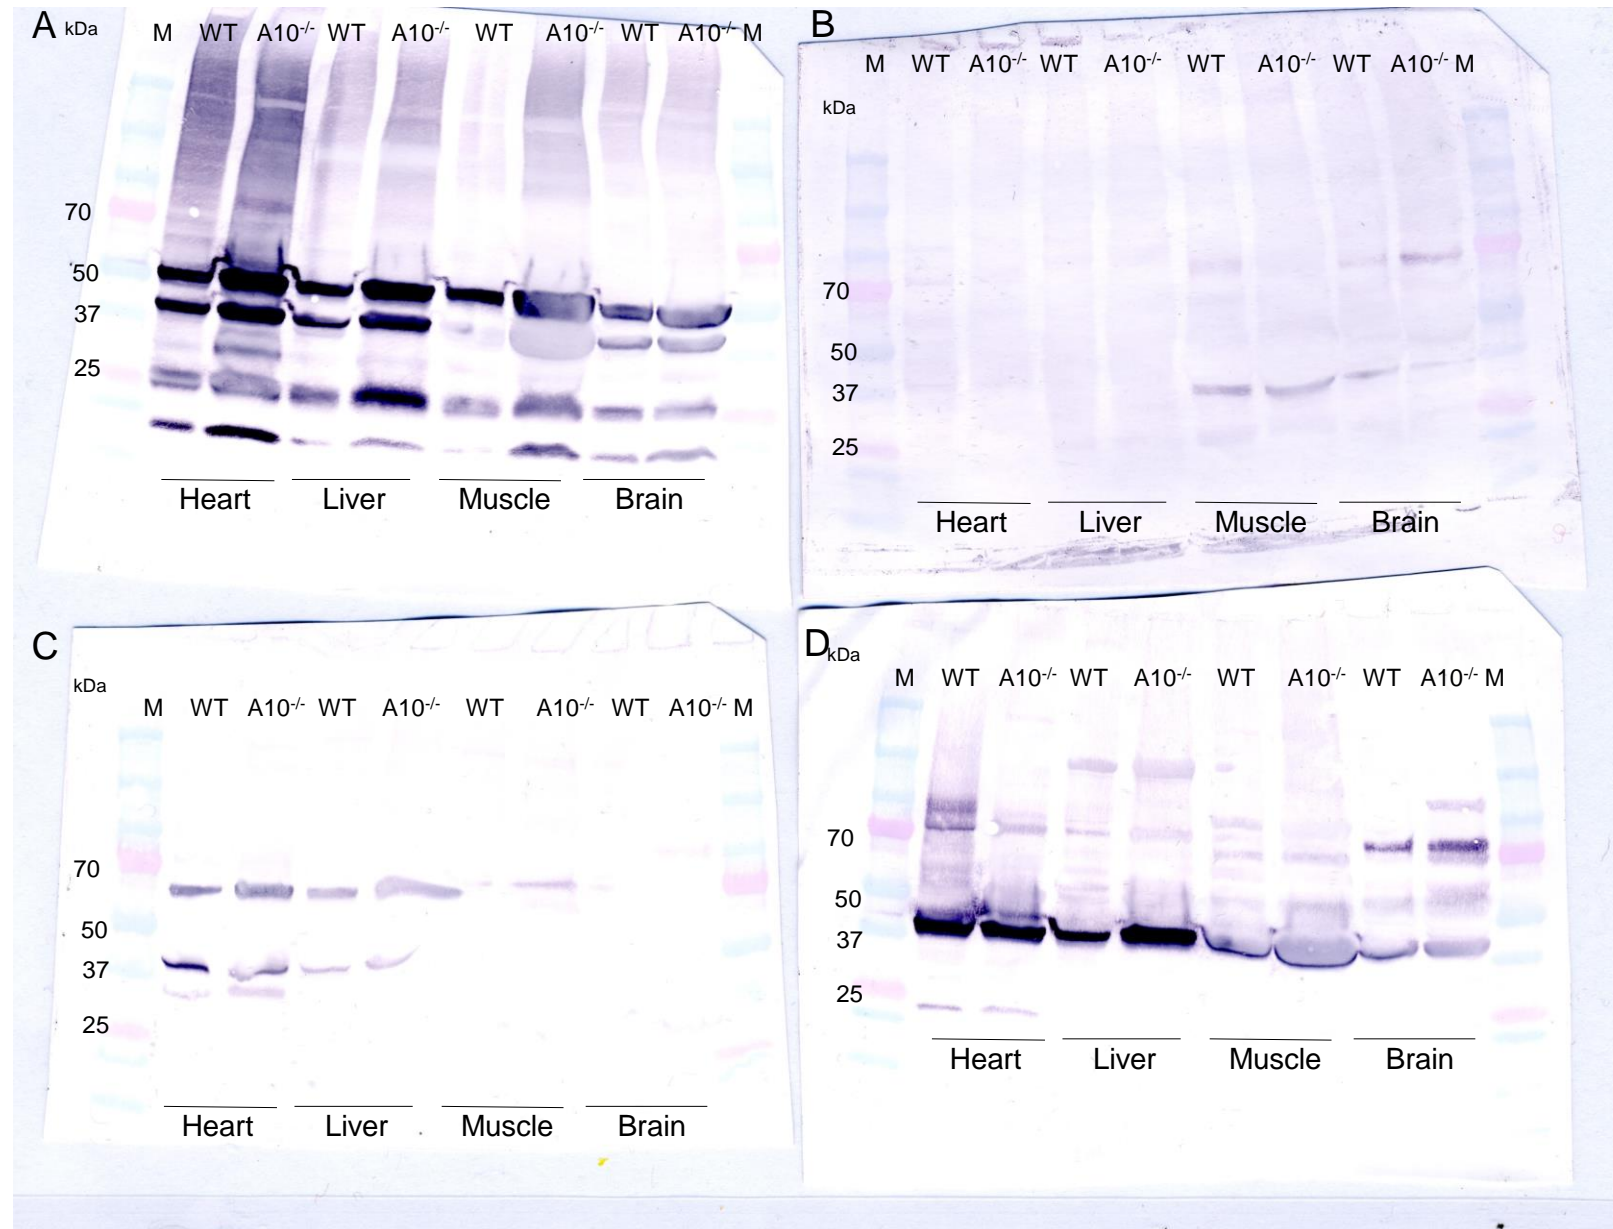

Supplement: pone.0242445.s001.pdf [file pone.0242445.s001.pdf]
